# Supplementary material for: Food Allergy Knowledge and Attitudes among School Nurses in an Urban Public School District
Source: Children (Basel). 2015 Jul 21;2(3):330–41. doi: 10.3390/children2030330 (PMC4928767; doi:10.3390/children2030330)

Table 1: Demographic characteristics of school nurses

| Characteristic                                                    | Sample Population (N=162),<br>n (%) |
|-------------------------------------------------------------------|-------------------------------------|
| Female Gender                                                     | 162 (100)                           |
| Nurse has food allergy                                            | 33 (24)                             |
| Nurse knows someone with food allergy                             | 120 (87)                            |
| Nurse previously received information about food allergy          | 58 (42)                             |
| Nurse treated student for food-allergic reaction within past year | 87 (59)                             |

Figure 1: Knowledge scores by content domain

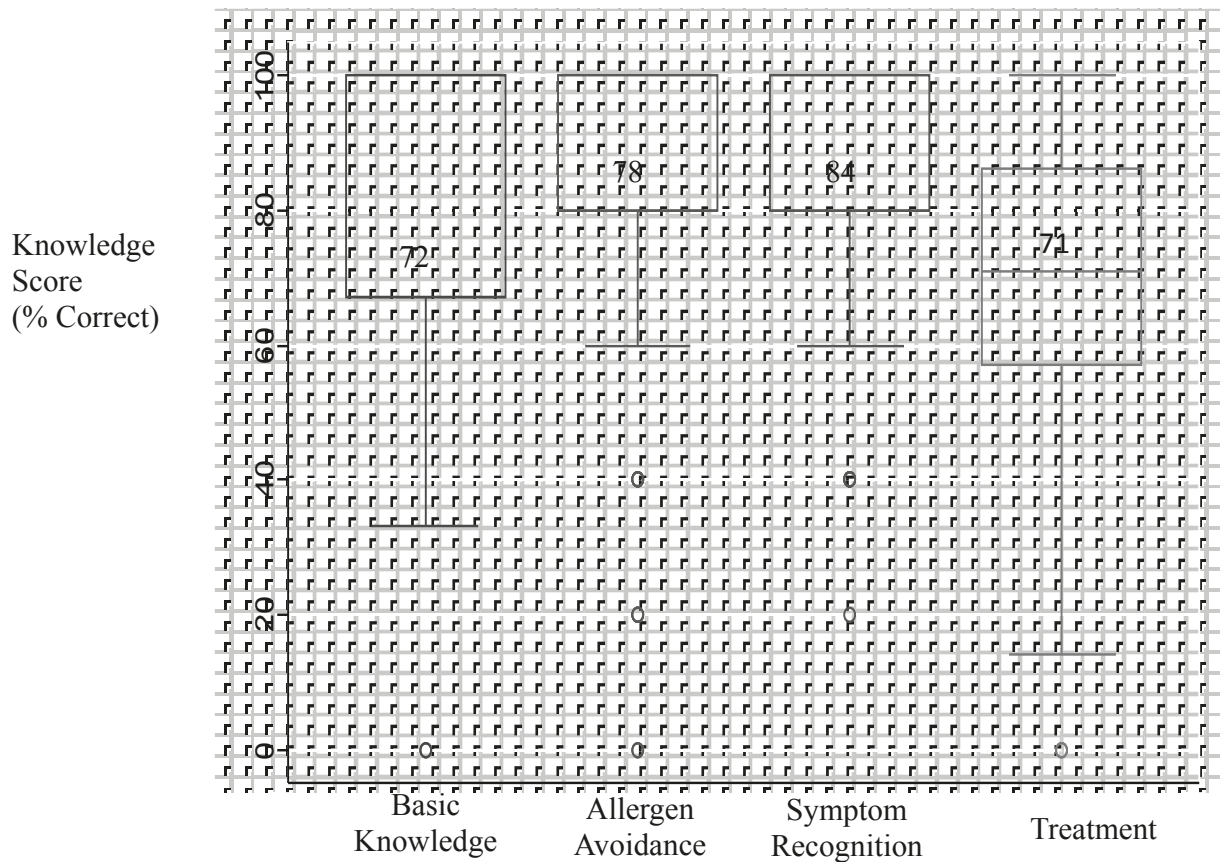

Table 2: Food Allergy Knowledge Strengths

| Item                                                                                                                                                                      | Prevalence of Correct Response |
|---------------------------------------------------------------------------------------------------------------------------------------------------------------------------|--------------------------------|
| <b>Allergen Avoidance</b>                                                                                                                                                 |                                |
| A package with a precautionary label stating “processed on shared equipment with milk” but does not list milk as an ingredient is safe for a milk-allergic child. (False) | 93 %                           |
| A small bite of food is not enough to cause a life-threatening reaction. (False)                                                                                          | 91 %                           |
| If a salad is topped with walnuts, you can safely feed it to a walnut-allergic person if you remove the walnuts. (False)                                                  | 96 %                           |
| <b>Symptom Recognition</b>                                                                                                                                                |                                |
| A person can die within minutes from a food allergic reaction. (True)                                                                                                     | 93 %                           |
| Anaphylaxis can cause shock, a sudden and dangerous drop in blood pressure. (True)                                                                                        | 95 %                           |
| <b>Treatment</b>                                                                                                                                                          |                                |
| Epinephrine should be given to treat an allergic reaction only if a student has lost consciousness, but not before. (False)                                               | 92 %                           |
| Parents whose peanut-allergic child attends a peanut-free school do not need to supply the school with epinephrine or an emergency action plan. (False)                   | 94 %                           |

Table 3: Food Allergy Knowledge Weaknesses

| Item                                                                                                                                               | Prevalence of Correct Response |
|----------------------------------------------------------------------------------------------------------------------------------------------------|--------------------------------|
| <b>Basic Knowledge</b>                                                                                                                             |                                |
| The course of a food allergic reaction is predictable if you know the allergic symptoms a student has experienced in the past. (False)             | 47 %                           |
| <b>Allergen Avoidance</b>                                                                                                                          |                                |
| To reduce cross-contamination from food residue left on hands after eating, use of an anti-bacterial hand sanitizer is recommended. (False)        | 39 %                           |
| <b>Treatment</b>                                                                                                                                   |                                |
| You may safely administer a second dose of epinephrine if allergic symptoms have not improved after 10 minutes of receiving the first dose. (True) | 39 %                           |
| Epinephrine is an extremely dangerous drug with many potentially harmful side-effects. (False)                                                     | 49 %                           |
| Benadryl or other antihistamine should always be the first medication given when a student is having a food-allergic reaction. (False)             | 63 %                           |

Table 4: School nurse attitudes towards food allergy

| Item                                                                                                                    | Prevalence<br>Agree/Strongly<br>Agree |
|-------------------------------------------------------------------------------------------------------------------------|---------------------------------------|
| <b>General Food Allergy Beliefs</b>                                                                                     |                                       |
| I think food allergy is a serious problem for children in the United States.                                            | 94 %                                  |
| <b>School Policy Attitudes</b>                                                                                          |                                       |
| Schools should have guidelines for managing food allergy reactions in students.                                         | 94 %                                  |
| Nut-free schools help to keep students with nut allergy safe, and should be implemented in my school.                   | 82 %                                  |
| Students with food allergy should have special allergen-free tables available so they can safely eat at school.         | 44 %                                  |
| <b>Perceptions of Student Impact</b>                                                                                    |                                       |
| It is hard for students with food allergy to safely eat out.                                                            | 53 %                                  |
| It is hard for students with food allergy to safely eat at school.                                                      | 43 %                                  |
| Students with food allergy tend to worry a lot about their condition.                                                   | 40 %                                  |
| Students are teased/bullied about their food allergy in the school setting.                                             | 32 %                                  |
| <b>Perceptions of Parents</b>                                                                                           |                                       |
| Parents of food-allergic children tend to be more overprotective than parents of children with other chronic illnesses. | 55 %                                  |
| Parents of food-allergic children make unreasonable requests of school personnel.                                       | 15 %                                  |

Table 5: Predictors of Nurse School Policy Attitudes

| Subgroup Characteristic                                                   | Agreement with<br>Nut-free Schools |         | p value | Agreement with<br>Allergen-Free Tables |         |
|---------------------------------------------------------------------------|------------------------------------|---------|---------|----------------------------------------|---------|
|                                                                           | n (%)                              |         |         | n (%)                                  | p value |
| Overall population                                                        | 130 (82)                           |         |         | 68 (44)                                |         |
| Nurse previously received information about food allergy                  |                                    |         |         |                                        |         |
| Yes                                                                       | 44 (77)                            | 0.30    |         | 32 (56)                                | 0.01 *  |
| No                                                                        | 64 (84)                            |         |         | 25 (33)                                |         |
| Nurse believes it is hard for students with food allergy to eat out       |                                    |         |         |                                        |         |
| Yes                                                                       | 72 (89)                            | 0.02 *  |         | 41 (53)                                | 0.04 *  |
| No                                                                        | 54 (74)                            |         |         | 26 (36)                                |         |
| Nurse believes it is hard for students with food allergy to eat at school |                                    |         |         |                                        |         |
| Yes                                                                       | 60 (94)                            | <0.01 * |         | 35 (56)                                | 0.02 *  |
| No                                                                        | 63 (72)                            |         |         | 31 (36)                                |         |

Table 6: Relationships of Nurses' Parent and Student Perceptions

| Subgroup Characteristic                                                               | Agreement that Food-Allergic Students Worry<br>n (%) | p value  | Agreement that Food-Allergic Students are Teased/Bullied<br>n (%) | p value |
|---------------------------------------------------------------------------------------|------------------------------------------------------|----------|-------------------------------------------------------------------|---------|
| Overall population                                                                    | 62 (40)                                              |          | 51 (32)                                                           |         |
| Nurse believes parents of food-allergic children are more over-protective than others |                                                      |          |                                                                   |         |
| Yes                                                                                   | 41 (48)                                              | 0.02 *   | 36 (41)                                                           | 0.01 *  |
| No                                                                                    | 20 (29)                                              |          | 15 (22)                                                           |         |
| Nurse believes parents of food-allergic children make unreasonable requests of school |                                                      |          |                                                                   |         |
| Yes                                                                                   | 17 (74)                                              | < 0.01 * | 12 (55)                                                           | 0.02 *  |
| No                                                                                    | 44 (34)                                              |          | 38 (29)                                                           |         |

Figure 2: Knowledge Scores by Nurse Attitudes

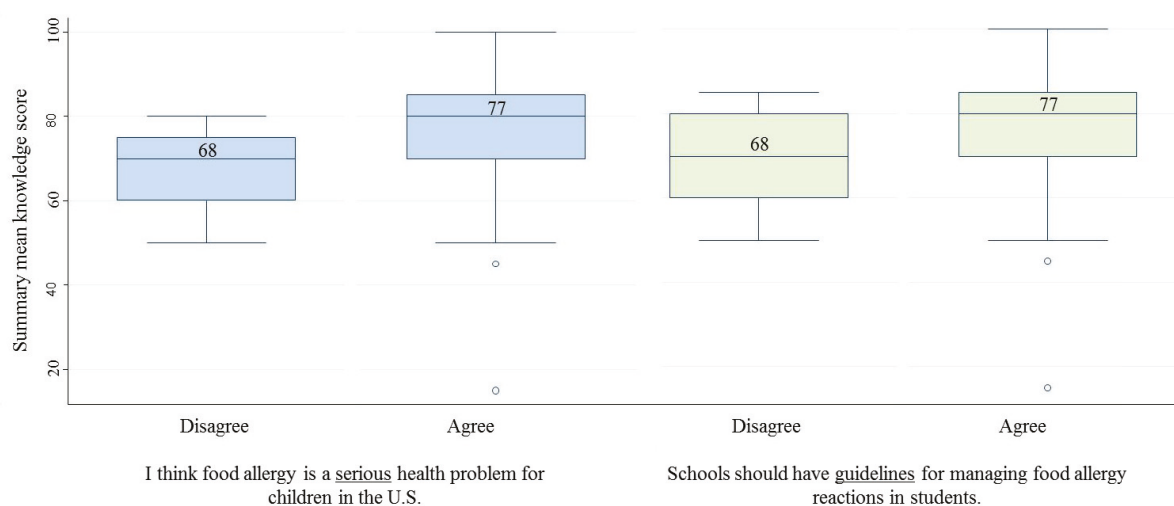

Supplement: Supplementary File 1 [file children-02-00330-s001.pdf]
